# Supplementary material for: A Second Photoactivatable State of the Anion-conducting channelrhodopsin GtACR1 empowers persistent activity
Source: Research Square preprint supplement (doi:10.21203/rs.3.rs-5677201/v1), 2025-03-17
Supplement: Supplementary file 1 [file ea60588c3bb611af3a3e6d34.docx]

**Supplementary Information**

**Supplementary Figure 1**


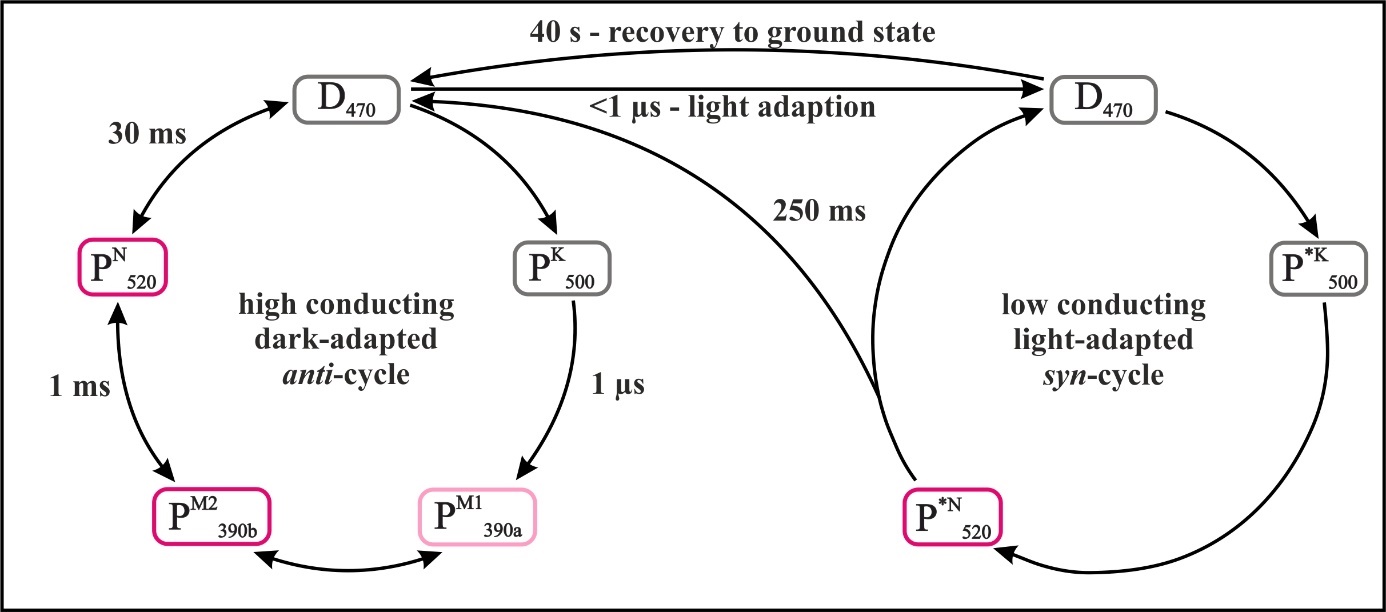


**Supplementary Figure 1: Photocycle model of *Cr*ChR2** Model of the branched photocycle of *Cr*ChR2 (reproduced and modified from Kuhne et al.1). The “dark-adapted” *anti*-cycle (left) exclusively comprises a C=N-*anti*-configuration of the retinal, is highly conducting and relatively fast. In the “light-adapted” *syn*-cycle (right), the retinal has a 13-*cis*, C=N-*syn* configuration. The *syn*-cycle is poorly conducting and decays at a slower rate. During continuous illumination, molecules are accumulated in the *syn*-cycle, which causes the inactivation of *Cr*ChR2.

**Supplementary Figure 2**


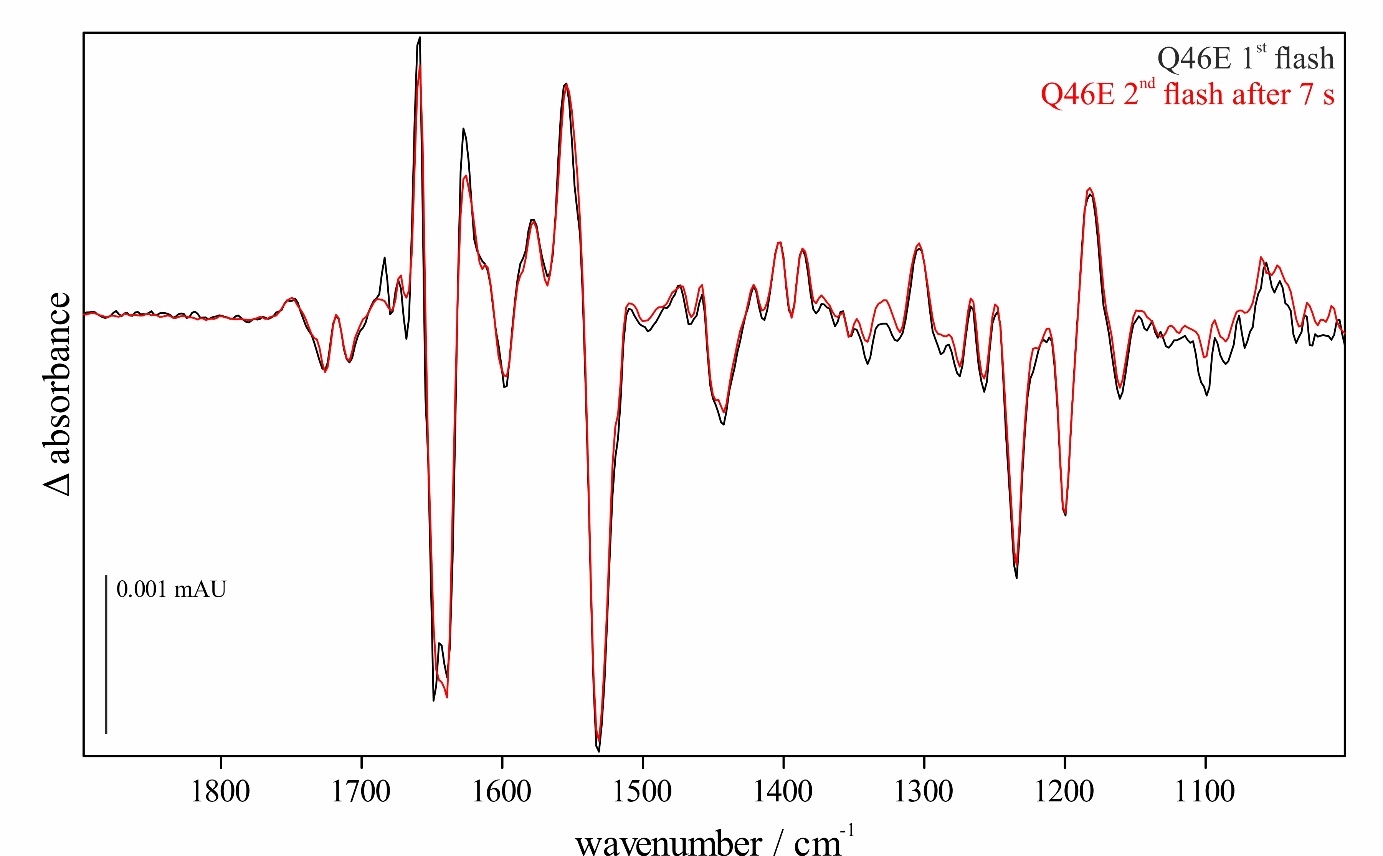


**Supplementary Figure 2: Excitation spectra of the *Gt*ACR1 variant Q46E at different exposure times.** The respective excitation spectra after one flash (black) and a second flash after 7 s (red) are shown. Similar to the *Gt*ACR1 WT, a large proportion of the proteins can be re-excited after 7 s. The time of the second flash was adapted to the lifetime of the mutant (see Supplementary Note 3 and Supplementary Table 1).

**Supplementary Table 1:** Determined half-lives t1/2 of all analysed samples obtained by rapid-scan FTIR measurements

| **Sample name** | **T4/ ms** | **T5/ ms** | **T6/ ms** |
| --- | --- | --- | --- |
| ACR1 WT 1st flash | 44 | 150 | 15890 |
| ACR1 WT 2nd flash | 88 | 1438 | 93490 |
| ACR1 WT 5th flash | 76 | 1849 | 68960 |
| ACR1 WT continuous light | 203 | 3415 | 68290 |
| ACR1 Q46E 1st flash | 230 | 965 | 30570 |
| ACR1 Q46E 2nd flash | 171 | 2285 | 667100 |

**Supplementary Table 2:** FTIR marker bands that are important in connection with retinal proteins

| **Wavenumber / cm-1** | **associated group** |
| --- | --- |
| 1184 | protonated 13-*cis* retinal |
| 1691 | pore formation, channel opening and conducting state |
| 1708 | protonated E68 |
| 1644 | conformational changes during channel opening and closing |
| 1529 | retinal C=C ground state |
| 1444 | M intermediate |

**Supplementary Note 1:**

The time at which 99% of the M intermediate was decayed was calculated as follows.

First, the decay constant k was calculated using the half-life (t1/2) for the decay of M (T5) as determined by the FTIR measurements

Finally, the point in time was calculated at which only 1% of the intermediate ( was still present

According to this calculation, 99% of the M intermediate should have decayed after 996 ms, i.e. 0.99 s.

**Supplementary Note 2:**

The percentage of the ground state and resulting from this the percentage of the N/O intermediate was calculated as follows.

First, the decay constant k was calculated using the half-life (t1/2) for the decay of N/O (T6) as determined by the FTIR measurements

Finally, the percentage of how much N/O intermediate is still present after 1 s was calculated

According to this calculation, 96% of the proteins is still in N/O intermediate 1 s after the initial excitation, correspondingly 4% have already reached the ground state.

**Supplementary Note 3:**

The time at which 99% of the M intermediate in the *Gt*ACR1 variant Q46E was decayed was calculated as follows.

First, the decay constant k was calculated using the half-life (t1/2) for the decay of M (T5) as determined by the FTIR measurements

Finally, the point in time was calculated at which only 1% of the intermediate ( was still present

According to this calculation, 99% of the M intermediate should have decayed after  ms, i.e. 6.6 s.

References

**1** Kuhne J, Vierock J, Tennigkeit SA, et al. Unifying photocycle model for light adaptation and temporal evolution of cation conductance in channelrhodopsin-2. *Proc Natl Acad Sci U S A*. 2019;116(19):9380-9389. doi:10.1073/pnas.1818707116.
